# Supplementary material for: Hemodynamic Response Alterations in Sensorimotor Areas as a Function of Barbell Load Levels during Squatting: An fNIRS Study
Source: PubMed Central journal article supplement (PMC5430058; doi:10.3389/fnhum.2017.00241), 2017-05-15
Supplement: Table_1_v1.pdf [file Table_1_v1.pdf]

**Table 1.** Results of post – hoc paired t – tests between barbell load levels for configuration (A).

| Channel  | Post – hoc tests |          |               |          |                |          |               |          |               |          |                |        |
|----------|------------------|----------|---------------|----------|----------------|----------|---------------|----------|---------------|----------|----------------|--------|
|          | HbO <sub>2</sub> |          |               |          |                |          | HHb           |          |               |          |                |        |
|          | 20% versus 0%    |          | 40% versus 0% |          | 40% versus 20% |          | 20% versus 0% |          | 40% versus 0% |          | 40% versus 20% |        |
| <i>t</i> | <i>p</i>         | <i>t</i> | <i>p</i>      | <i>t</i> | <i>p</i>       | <i>t</i> | <i>p</i>      | <i>t</i> | <i>p</i>      | <i>t</i> | <i>p</i>       |        |
| 1        | 2.671            | .0256    | 8.439         | <.0001*  | 5.710          | .0003*   | 1.619         | .1399    | 2.383         | .0410    | 3.212          | .0106  |
| 2        | 2.204            | .0550    | 4.322         | .0019*   | 4.570          | .0013*   | .649          | .5323    | 2.628         | .0274    | 3.284          | .0095  |
| 3        | 1.607            | .1426    | 5.340         | .0005*   | 6.172          | .0002*   | .887          | .3980    | 6.480         | .0001*   | 4.980          | .0008* |
| 4        | 2.080            | .0673    | 4.265         | .0021*   | 3.730          | .0047    | 1.803         | .1048    | 2.324         | .0452    | 2.463          | .0360  |
| 5        | 4.942            | .0008*   | 11.145        | <.0001*  | 9.446          | <.0001*  | 2.322         | .0454    | 3.761         | .0045    | 2.501          | .0338  |
| 6        | 2.094            | .0657    | 4.748         | .0010*   | 5.167          | .0006*   | 2.272         | .0492    | 4.344         | .0019*   | 2.513          | .0332  |
| 7        | 1.927            | .0861    | 4.923         | .0008*   | 5.291          | .0005*   | 3.275         | .0096    | 3.712         | .0048    | 1.836          | .0995  |
| 8        | 4.885            | .0009*   | 6.366         | .0001*   | 6.058          | .0002*   | -.359         | .7279    | 1.972         | .0800    | 2.144          | .0607  |
| 9        | 3.357            | .0084    | 4.537         | .0014*   | 4.091          | .0027    | -1.517        | .1636    | 2.014         | .0749    | 2.785          | .0212  |
| 10       | 4.212            | .0023*   | 6.613         | .0001*   | 5.013          | .0007*   | -2.095        | .0657    | 1.692         | .1249    | 2.147          | .0603  |
| 11       | 4.903            | .0008*   | 7.748         | <.0001*  | 7.574          | <.0001*  | -2.353        | .0431    | 1.151         | .2795    | 3.599          | .0058  |
| 12       | 2.122            | .0628    | 2.948         | .0163    | 2.833          | .0196    | -2.245        | .0514    | 1.246         | .2443    | 1.557          | .1539  |
| 13       | 2.936            | .0166    | 5.241         | .0005*   | 4.674          | .0012*   | .577          | .5782    | 2.006         | .0758    | 2.236          | .0522  |
| 14       | 4.666            | .0012*   | 6.728         | .0001*   | 6.166          | .0002*   | -.747         | .4740    | 1.585         | .1475    | 2.354          | .0431  |
| 15       | 4.795            | .0010*   | 6.085         | .0002*   | 5.145          | .0006*   | -.075         | .9422    | 2.493         | .0342    | 3.081          | .0131  |
| 16       | 2.676            | .0254    | 6.558         | .0001*   | 5.542          | .0004*   | .535          | .6054    | 2.546         | .0314    | 2.382          | .0411  |
| 17       | 2.701            | .0244    | 8.627         | <.0001*  | 10.742         | <.0001*  | 2.936         | .0166    | 2.627         | .0275    | 2.220          | .0536  |
| 18       | 1.508            | .1658    | 3.947         | .0034    | 3.555          | .0062    | 1.051         | .3205    | 2.267         | .0496    | 2.084          | .0668  |
| 19       | 3.187            | .0111    | 7.680         | <.0001*  | 6.747          | .0001*   | .319          | .7571    | 3.768         | .0044    | 3.275          | .0096  |
| 20       | 1.206            | .2585    | 5.914         | .0002*   | 7.020          | .0001*   | 1.949         | .0831    | 3.475         | .0070    | 3.353          | .0085  |
| 21       | 2.174            | .0578    | 4.968         | .0008*   | 5.255          | .0005*   | -.893         | .3952    | 2.065         | .0689    | 2.767          | .0219  |
| 22       | 1.412            | .1915    | 3.915         | .0035    | 4.526          | .0014*   | -.449         | .6614    | 3.270         | .0097    | 3.496          | .0068  |

Note: Asterisks indicate significant effects between barbell load levels, after correction for multiple comparisons (adjusted p – value  $p < 0.0023$ ). Please note that data listed below (*t* – statistics), corresponds to the topographic images in Figures 2 (I) and 3 (I).

**Table 2.** Results of post – hoc paired t – tests between barbell load levels for configuration (B).

| Channel  | Post – hoc tests |          |               |          |                |          |               |          |               |          |                |       |
|----------|------------------|----------|---------------|----------|----------------|----------|---------------|----------|---------------|----------|----------------|-------|
|          | HbO <sub>2</sub> |          |               |          |                |          | HHb           |          |               |          |                |       |
|          | 20% versus 0%    |          | 40% versus 0% |          | 40% versus 20% |          | 20% versus 0% |          | 40% versus 0% |          | 40% versus 20% |       |
| <i>t</i> | <i>p</i>         | <i>t</i> | <i>p</i>      | <i>t</i> | <i>p</i>       | <i>t</i> | <i>p</i>      | <i>t</i> | <i>p</i>      | <i>t</i> | <i>p</i>       |       |
| 1        | 1.101            | .2995    | 2.302         | .0468    | 2.160          | .0591    | -1.624        | .1388    | -2.207        | .0547    | -.771          | .4607 |
| 2        | 5.969            | .0002*   | 9.328         | <.0001*  | 6.929          | <.0001*  | 1.348         | .2106    | 2.280         | .0486    | 2.083          | .0669 |
| 3        | 4.277            | .0021*   | 6.180         | .0002*   | 5.462          | .0004*   | -.334         | .7462    | 2.121         | .0619    | 3.424          | .0076 |
| 4        | 4.434            | .0016*   | 8.562         | <.0001*  | 5.273          | .0005*   | -1.498        | .1684    | 1.610         | .1419    | 1.992          | .0775 |
| 5        | 4.315            | .0019*   | 6.119         | .0002*   | 4.911          | .0008*   | .414          | .6886    | 1.509         | .1655    | 2.217          | .0538 |
| 6        | 2.490            | .0344    | 9.973         | <.0001*  | 6.130          | .0002*   | -.429         | .6777    | 1.798         | .1057    | 1.345          | .2115 |
| 7        | 4.149            | .0025*   | 8.278         | <.0001*  | 6.466          | .0001*   | .064          | .9505    | 1.836         | .0996    | 2.166          | .0585 |
| 8        | 7.203            | .0001*   | 9.450         | <.0001*  | 6.361          | .0001*   | -1.106        | .2973    | 1.440         | .1837    | 2.821          | .0200 |
| 9        | 3.934            | .0034*   | 10.110        | <.0001*  | 8.706          | <.0001*  | -.352         | .7329    | 2.747         | .0226    | 2.479          | .0350 |
| 10       | 4.641            | .0012*   | 9.592         | <.0001*  | 6.737          | .0001*   | .573          | .5805    | 1.638         | .1358    | 2.035          | .0724 |
| 11       | 1.659            | .1314    | 3.938         | .0034*   | 4.755          | .0010*   | -1.339        | .2133    | 1.541         | .1576    | 1.713          | .1209 |
| 12       | .573             | .5805    | 3.772         | .0044    | 5.425          | .0004*   | -1.299        | .2264    | -.407         | .6932    | .811           | .4384 |
| 13       | 2.128            | .0622    | 2.699         | .0244    | 2.687          | .0249    | .279          | .7863    | .324          | .7530    | .369           | .7240 |

*Note:* Asterisks indicate significant effects between barbell load levels after correction for multiple comparisons (adjusted p – value  $p < 0.0038$ ). Please note that data listed below (*t* – statistics), corresponds to the topographic images in Figures 2(II) and 3 (II).

**Table 3.** Results of post – hoc paired t – tests between barbell load levels for configuration (C).

| Channel  | Post – hoc tests |          |               |          |                |          |               |          |               |          |                |        |
|----------|------------------|----------|---------------|----------|----------------|----------|---------------|----------|---------------|----------|----------------|--------|
|          | HbO <sub>2</sub> |          |               |          |                |          | HHb           |          |               |          |                |        |
|          | 20% versus 0%    |          | 40% versus 0% |          | 40% versus 20% |          | 20% versus 0% |          | 40% versus 0% |          | 40% versus 20% |        |
| <i>t</i> | <i>p</i>         | <i>t</i> | <i>p</i>      | <i>t</i> | <i>p</i>       | <i>t</i> | <i>p</i>      | <i>t</i> | <i>p</i>      | <i>t</i> | <i>p</i>       |        |
| 1        | 3.281            | .0095    | 4.102         | .0027    | .2.426         | .0383    | -.7786        | .4562    | .2172         | .8329    | 1.651          | .1331  |
| 2        | 1.174            | .2706    | 1.790         | .1071    | 1.901          | .0897    | -.2980        | .7725    | 1.030         | .3296    | 1.188          | .2652  |
| 3        | .301             | .7703    | 2.242         | .0516    | 2.313          | .0460    | -.2429        | .8135    | 1.083         | .3068    | 1.539          | .1580  |
| 4        | 2.234            | .0524    | 1.857         | .0962    | .240           | .8160    | .6857         | .5102    | .4063         | .6940    | .6327          | .5427  |
| SD       |                  |          |               |          |                |          |               |          |               |          |                |        |
| 6        | 2.199            | .0555    | 2.716         | .0238    | .973           | .3558    | -.9917        | .3473    | .0085         | .9934    | 1.238          | .2467  |
| 7        | 3.609            | .0057    | 3.505         | .0067    | 1.982          | .0788    | -1.518        | .1632    | .0690         | .9465    | 1.384          | .1996  |
| 8        | 2.448            | .0369    | 4.174         | .0024    | 1.822          | .1017    | -1.609        | .2755    | .0959         | .9257    | 1.186          | .2658  |
| 9        | 3.684            | .0050    | 3.373         | .0082    | 1.153          | .2787    | -3.142        | .0119    | -1.241        | .2460    | 1.413          | .1911  |
| 10       | .860             | .4119    | 1.803         | .1048    | 1.480          | .1729    | -2.938        | .0165    | .0725         | .9438    | 2.132          | .0618  |
| 11       | 1.523            | .1620    | 2.770         | .0217    | 3.273          | .0096    | -.7802        | .4553    | .2543         | .8049    | 1.080          | .3079  |
| 12       | 1.065            | .3146    | 2.655         | .0263    | 3.850          | .0039    | -1.275        | .9013    | 1.751         | .1137    | 1.998          | .0767  |
| 13       | -.507            | .6241    | 2.296         | .0473    | 2.619          | .0278    | .2111         | .8375    | 1.382         | .2003    | 2.813          | .0203  |
| 14       | 1.064            | .3152    | 4.846         | .0009*   | 4.350          | .0019*   | -1.188        | .2650    | -.2341        | .8201    | .9941          | .3461  |
| 15       | 1.907            | .0889    | 4.946         | .0008*   | 4.558          | .0014*   | -.6637        | .5235    | -.5846        | .5732    | 1.441          | .1834  |
| 16       | .737             | .4800    | 1.666         | .1301    | 1.339          | .2133    | -1.798        | .1056    | 1.184         | .2667    | 2.004          | .0760  |
| 17       | -1.034           | .3281    | 1.610         | .1418    | 2.838          | .0195    | .9873         | .3493    | 2.289         | .0487    | 1.674          | .1284  |
| 18       | .686             | .5102    | 1.625         | .1386    | 1.503          | .1671    | -2.541        | .0316    | 2.142         | .0608    | 4.026          | .0030  |
| 19       | 1.073            | .3111    | 2.401         | .0398    | 2.642          | .0268    | .1658         | .8720    | 1.991         | .0776    | 4.391          | .0017* |
| 20       | -.534            | .6063    | 1.505         | .1667    | 2.823          | .0199    | .6766         | .5157    | 1.091         | .3034    | .4545          | .6602  |
| 21       | .407             | .6938    | 3.293         | .0093    | 3.647          | .0053    | -.6458        | .5345    | .6470         | .5338    | 3.553          | .0062  |
| 22       | .539             | .6031    | 2.217         | .0539    | 2.479          | .0350    | 1.446         | .1820    | 2.377         | .0414    | 2.064          | .0690  |
| 23       | -.754            | .4701    | 1.596         | .1449    | 3.203          | .0108    | .8617         | .4112    | 2.805         | .0205    | 1.182          | .2672  |

Note: Asterisks indicate significant effects between barbell load levels after correction for multiple comparisons (adjusted p – value  $p < 0.0023$ ). Please note that data listed below (*t* – statistics), correspond to the topographic images in Figures 2 (III) and 3 (III).

**Table 4.** Results of post – hoc paired t – tests between barbell load levels and baseline activity for configuration (A).

| Channel  | Post – hoc tests |          |               |          |               |          |              |          |               |          |               |       |
|----------|------------------|----------|---------------|----------|---------------|----------|--------------|----------|---------------|----------|---------------|-------|
|          | HbO <sub>2</sub> |          |               |          |               |          | HHb          |          |               |          |               |       |
|          | 0% versus BL     |          | 20% versus BL |          | 40% versus BL |          | 0% versus BL |          | 20% versus BL |          | 40% versus BL |       |
| <i>t</i> | <i>p</i>         | <i>t</i> | <i>p</i>      | <i>t</i> | <i>p</i>      | <i>t</i> | <i>p</i>     | <i>t</i> | <i>p</i>      | <i>t</i> | <i>p</i>      |       |
| 1        | 7.014            | <.0001*  | 7.590         | <.0001*  | 7.552         | <.0001*  | 3.650        | .0053    | 3.112         | 0.125    | 3.298         | .0093 |
| 2        | 3.001            | .0149    | 3.190         | .0110    | 3.443         | .0074    | 2.421        | .0385    | 2.283         | .0484    | 2.887         | .0180 |
| 3        | 4.131            | .0026    | 4.2989        | .0020*   | 4.677         | .0012*   | .152         | .8822    | .270          | .7932    | 1.540         | .1669 |
| 4        | 3.185            | .0111    | 3.389         | .0080    | 3.573         | .0060    | .088         | .9314    | .521          | .6152    | 1.223         | .2523 |
| 5        | 3.949            | .0034    | 4.528         | .0014*   | 5.202         | .0006*   | -.957        | .3635    | -.058         | .9551    | 1.126         | .2895 |
| 6        | 4.351            | .0018*   | 4.534         | .0014*   | 4.848         | .0009*   | 1.174        | .2707    | 1.786         | .1077    | 2.271         | .0493 |
| 7        | 3.315            | .0090    | 3.602         | .0057    | 3.956         | .0033    | 1.677        | .1278    | 2.156         | .0594    | 2.925         | .0169 |
| 8        | 4.433            | .0016*   | 4.755         | .0010*   | 5.068         | .0007*   | 1.258        | .2401    | 1.227         | .2509    | 1.628         | .1381 |
| 9        | 3.059            | .0136    | 3.229         | .0103    | 3.435         | .0074    | .631         | .5440    | .268          | .7948    | 1.140         | .2838 |
| 10       | 4.581            | .0013*   | 4.900         | .0008*   | 5.067         | .0007*   | 1.813        | .1033    | 1.493         | .1696    | 1.850         | .0973 |
| 11       | 5.659            | .0003*   | 6.270         | <.0001*  | 6.958         | .0001*   | 1.123        | .2905    | .671          | .5188    | 1.374         | .2026 |
| 12       | 3.185            | .0111    | 3.192         | .0110    | 3.219         | .0105    | 1.702        | .1230    | 1.442         | .1831    | 1.587         | .1470 |
| 13       | 4.140            | .0025    | 4.253         | .0021*   | 4.434         | .0016*   | 2.775        | .0216    | 2.711         | .0240    | 2.686         | .0250 |
| 14       | 5.493            | .0004*   | 5.668         | .0003*   | 5.982         | .0002*   | 2.316        | .0458    | 2.056         | .0699    | 2.540         | .0317 |
| 15       | 4.609            | .0013*   | 4.949         | .0008*   | 5.134         | .0006*   | 2.458        | .0363    | 2.485         | .0347    | 2.747         | .0226 |
| 16       | 4.944            | .0008*   | 5.019         | .0007*   | 5.381         | .0004*   | 2.056        | .0700    | 1.974         | .0798    | 2.258         | .0504 |
| 17       | 4.960            | .0008*   | 5.546         | .0004*   | 6.420         | .0001*   | .933         | .3751    | 1.199         | .2611    | 1.647         | .1340 |
| 18       | 2.885            | .0180    | 3.009         | .0147    | 3.134         | .0120    | 1.663        | .1308    | 1.738         | .1161    | 2.062         | .0692 |
| 19       | 4.314            | .0020*   | 4.609         | .0013*   | 5.132         | .0006*   | 1.371        | .2035    | 1.619         | .1400    | 2.349         | .0434 |
| 20       | 3.734            | .0047    | 4.237         | .0022*   | 4.668         | .0012*   | 1.848        | .0977    | 2.188         | .0564    | 3.012         | .0147 |
| 21       | 3.740            | .0046    | 4.052         | .0029    | 4.329         | .0019*   | 1.030        | .3300    | .833          | 4.266    | 1.596         | .1449 |
| 22       | 3.064            | .0135    | 3.348         | .0086    | 3.569         | .0060    | 1.405        | .1936    | 1.083         | .3068    | 2.598         | .0288 |

*Note:* Asterisks indicate significant effects between barbell load levels and baseline activity, after correction for multiple comparisons (adjusted p – value  $p < 0.0023$ ). Please note that data listed below (*t* – statistics), corresponds to the topographic images in Figures 4 (I) and 5 (I).

**Table 5.** Results of post – hoc paired t – tests between barbell load levels and baseline activity for configuration (B).

| Channel | Post – hoc tests |          |               |          |               |          |              |          |               |          |               |          |
|---------|------------------|----------|---------------|----------|---------------|----------|--------------|----------|---------------|----------|---------------|----------|
|         | HbO <sub>2</sub> |          |               |          |               |          | HHb          |          |               |          |               |          |
|         | 0% versus BL     |          | 20% versus BL |          | 40% versus BL |          | 0% versus BL |          | 20% versus BL |          | 40% versus BL |          |
|         | <i>t</i>         | <i>p</i> | <i>t</i>      | <i>p</i> | <i>t</i>      | <i>p</i> | <i>t</i>     | <i>p</i> | <i>t</i>      | <i>p</i> | <i>t</i>      | <i>p</i> |
| 1       | 2.103            | .0648    | 2.042         | .0715    | 2.128         | .0623    | -.1186       | .2658    | -1.353        | .2092    | -1.517        | .1636    |
| 2       | 8.881            | <.0001*  | 9.246         | <.0001*  | 11.577        | <.0001*  | 2.900        | .0176    | 2.851         | .0190    | 3.586         | .0059    |
| 3       | 5.320            | .0005*   | .5352         | .0005*   | 6.050         | .0002*   | 1.653        | .1327    | 1.479         | .1732    | 2.110         | .0641    |
| 4       | 7.054            | .0001*   | .7149         | .0001*   | 8.649         | <.0001*  | .977         | .3543    | .365          | .7233    | 2.255         | .0506    |
| 5       | 4.812            | .0010*   | 5.063         | .0007*   | 5.623         | .0003*   | 1.182        | .2675    | 1.186         | .2658    | 1.439         | .1840    |
| 6       | 6.434            | .0001*   | 6.474         | .0001*   | 8.378         | .0000*   | 1.271        | .2357    | .799          | .4449    | 3.198         | .0109    |
| 7       | 10.521           | <.0001*  | 11.188        | <.0001*  | 11.808        | <.0001*  | 2.471        | .0355    | 2.194         | .0559    | 3.002         | .0149    |
| 8       | 5.375            | .0004*   | 5.695         | .0003*   | 6.798         | .0001*   | 1.205        | .2590    | .783          | .4536    | 1.350         | .2099    |
| 9       | 5.187            | .0006*   | 5.427         | .0004*   | 6.755         | .0001*   | 2.679        | .0252    | 2.295         | .0474    | 4.194         | .0023    |
| 10      | 4.200            | .0023*   | 4.428         | .0017*   | 5.276         | .0005*   | .266         | .7965    | .690          | .5077    | 3.114         | .0124    |
| 11      | 12.723           | <.0001*  | 12.590        | <.0001*  | 13.196        | <.0001*  | 1.153        | .2787    | 1.017         | .3356    | 1.259         | .2398    |
| 12      | 4.424            | .0017*   | 4.352         | .0018*   | 4.618         | .0013*   | .762         | .4653    | .307          | .7656    | .492          | .6347    |
| 13      | 2.759            | .0221    | 2.770         | .0217    | 2.780         | .0214    | .886         | .3985    | .830          | .4282    | .792          | .4487    |

*Note:* Asterisks indicate significant effects between barbell load levels and baseline activity, after correction for multiple comparisons (adjusted p – value  $p < 0.0038$ ). Please note that data listed below (t – statistics), corresponds to the topographic images in Figures 4 (II) and 5 (II).

**Table 6.** Results of post – hoc paired t – tests between barbell load levels and baseline activity for configuration (C).

| Channel | Post – hoc tests |          |               |          |               |          |              |          |               |          |               |          |
|---------|------------------|----------|---------------|----------|---------------|----------|--------------|----------|---------------|----------|---------------|----------|
|         | HbO <sub>2</sub> |          |               |          |               |          | HHb          |          |               |          |               |          |
|         | 0% versus BL     |          | 20% versus BL |          | 40% versus BL |          | 0% versus BL |          | 20% versus BL |          | 40% versus BL |          |
|         | <i>t</i>         | <i>p</i> | <i>t</i>      | <i>p</i> | <i>t</i>      | <i>p</i> | <i>t</i>     | <i>p</i> | <i>t</i>      | <i>p</i> | <i>t</i>      | <i>p</i> |
| 1       | 2.411            | .0392    | 2.841         | .0194    | 3.256         | .0099    | 1.715        | .1206    | 1.368         | .2046    | 1.668         | .1296    |
| 2       | 1.415            | .1907    | 1.435         | .1850    | 1.618         | .1402    | .498         | .6308    | .412          | .6899    | .697          | .5036    |
| 3       | .646             | .5347    | .635          | .5412    | .951          | .3665    | .278         | .7871    | .169          | .8698    | .434          | .6748    |
| 4       | 1.471            | .1754    | 1.599         | .1444    | .1681         | .1270    | -.943        | .3704    | -.473         | .6473    | -1.004        | .3414    |
| SD      |                  |          |               |          |               |          |              |          |               |          |               |          |
| 6       | 1.961            | .0815    | 2.205         | .0549    | 2.328         | .0449    | .128         | .9006    | -.060         | .9536    | .108          | .9161    |
| 7       | 1.524            | .1619    | 1.800         | .1054    | 2.117         | .0634    | 2.225        | .0531    | 1.487         | .1711    | 1.878         | .0931    |
| 8       | .995             | .3459    | 1.302         | .2254    | 1.526         | 1.613    | -.314        | .7606    | -.628         | .5457    | -.261         | .8003    |
| 9       | 2.705            | .0242    | 2.961         | .0159    | 3.109         | .0125    | -.331        | .7485    | -.939         | .3720    | -.606         | .5598    |
| 10      | .302             | .7693    | .387          | .7080    | .541          | .6017    | .745         | .4751    | .214          | .8356    | .657          | .5274    |
| 11      | .394             | .7028    | .573          | .5804    | .878          | .4028    | -1.458       | .1787    | -1.672        | 1.289    | -1.310        | .2225    |
| 12      | .178             | .8629    | .279          | .7862    | .509          | .6231    | -.111        | .9140    | -.127         | .9020    | .263          | .7987    |
| 13      | 2.247            | .0512    | 2.260         | .0501    | 2.691         | .0248    | 1.227        | .2511    | 1.069         | .3131    | 1.337         | .2142    |
| 14      | 3.151            | .0117    | 3.445         | .0073    | 3.829         | .0040    | .771         | .4606    | .313          | .7612    | .590          | .5694    |
| 15      | 3.206            | .0107    | 3.424         | .0076    | 3.627         | .0055    | .486         | .6387    | .316          | .7596    | .552          | .5945    |
| 16      | 1.589            | .1466    | 1.614         | .1411    | 1.652         | .1329    | .472         | .6481    | .132          | .8979    | .880          | .4020    |
| 17      | 1.140            | .2839    | 1.072         | .3117    | 1.317         | .2205    | 1.415        | .1908    | 1.625         | .1385    | 1.858         | .0961    |
| 18      | .109             | .9158    | .213          | .8362    | .412          | .6901    | -.049        | .9619    | -.637         | .5398    | .612          | .5554    |
| 19      | 1.226            | .2515    | .1266         | .2373    | 1.549         | .1558    | 2.261        | .0501    | 2.002         | .0763    | 2.523         | .0326    |
| 20      | -1.512           | .1648    | -1.513        | .1645    | -1.168        | .2730    | -.565        | .5861    | -.204         | .8432    | .007          | .9948    |
| 21      | -.162            | .8748    | -.118         | .9089    | .304          | .7682    | .602         | .5619    | .226          | .8265    | .964          | .3604    |
| 22      | .457             | .6582    | .510          | .6222    | .942          | .3710    | -.080        | .9383    | .214          | .8356    | .504          | .6267    |
| 23      | -.498            | .6307    | -.569         | .5831    | -.125         | .9036    | .770         | .4612    | .1057         | .3181    | 1.344         | .2120    |

Note: Asterisks indicate significant effects between barbell load levels and baseline activity, after correction for multiple comparisons (adjusted p – values  $p < 0.0023$ ). Please note that data listed below (*t* – statistics), corresponds to the topographic images in Figures 4(III) and 5 (III).
